# Supplementary material for: Antibiotic prescription strategies and adverse outcome for uncomplicated lower respiratory tract infections: prospective cough complication cohort (3C) study
Source: PubMed Central journal article supplement (PMC5439222; doi:10.1136/bmj.j2148), 2017-05-23

# Figure 1: Participant flow diagram

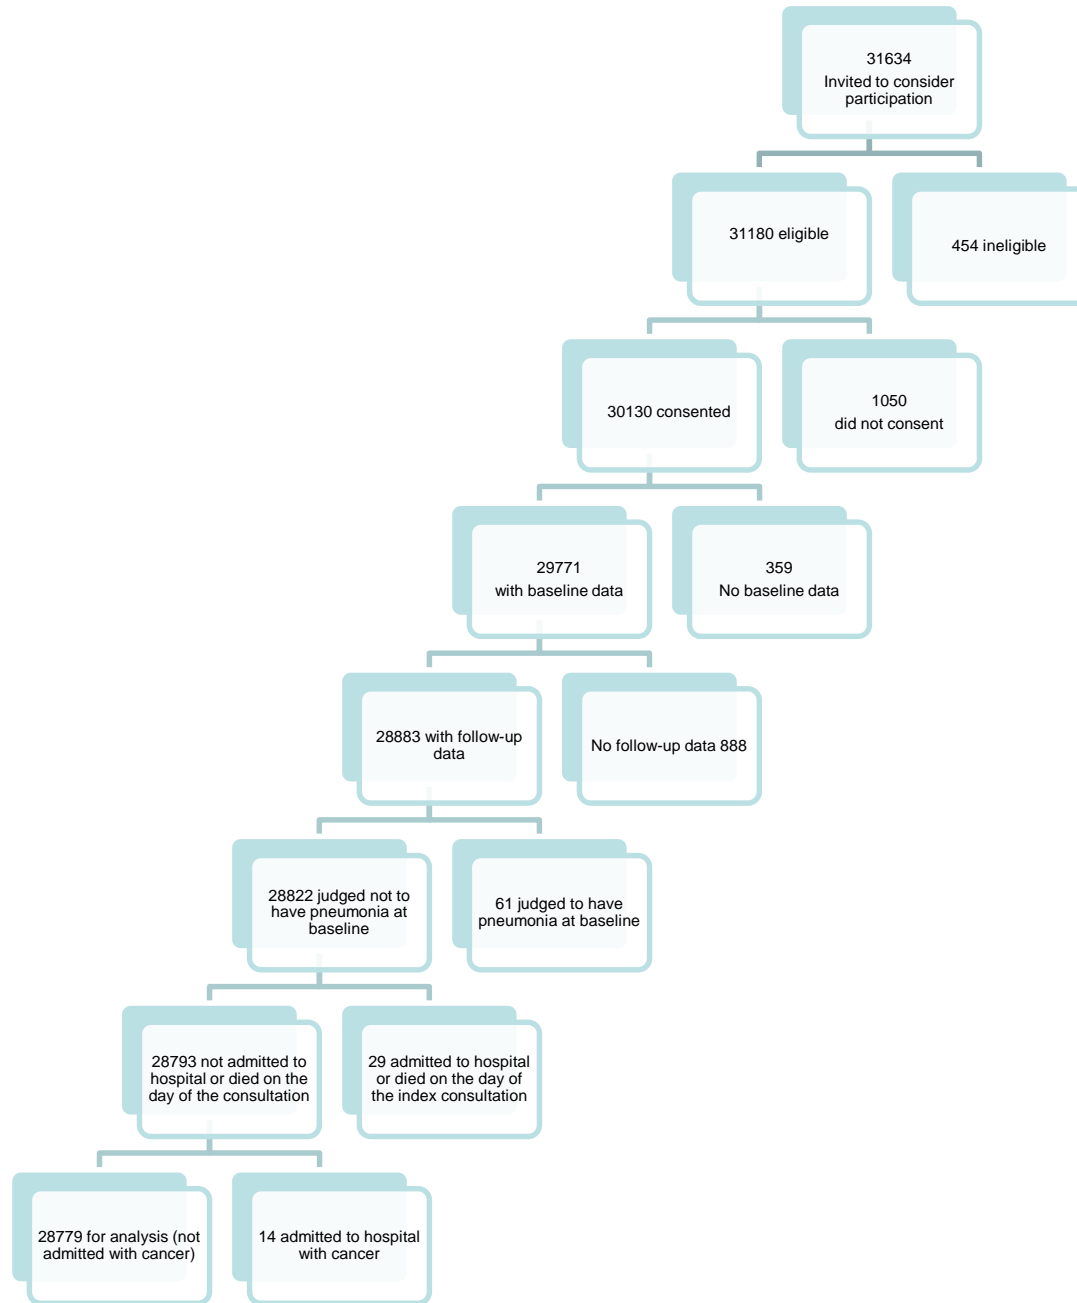

Supplement: litp035286.wf1.pdf [file litp035286.wf1.pdf]
